# Supplementary material for: Specific Amino Acid Substitutions in OXA-51-Type β-Lactamase Enhance Catalytic Activity to a Level Comparable to Carbapenemase OXA-23 and OXA-24/40
Source: MDPI journal article supplement (doi:10.3390/ijms23094496), 2022-04-19
Supplement: s1 [file s1]

# Specific Amino Acid Substitutions in OXA-51-Type $\beta$ -Lactamase Enhance Catalytic Activity to a Level Comparable to Carbapenemase OXA-23 and OXA-24/40

Kwan-Wai Chan <sup>1,2,†</sup>, Chen-Yu Liu <sup>2,†</sup>, Ho-Yin Wong <sup>1</sup>, Wai-Chi Chan <sup>1</sup>, Kwok-Yin Wong <sup>1</sup> and Sheng Chen <sup>2,\*</sup>

<sup>1</sup> State Key Laboratory of Chemical Biology and Drug Discovery, The Hong Kong Polytechnic University, Hung Hom, Kowloon, Hong Kong; bill.kw.chan@connect.polyu.hk (K.-W.C.); marcus-ho-yin.wong@polyu.edu.hk (H.-Y.W.); edwardwchan@yahoo.com.hk (W.-C.C.); kwok-yin.wong@polyu.edu.hk (K.-Y.W.)

<sup>2</sup> Department of Infectious Diseases and Public Health, City University of Hong Kong, Kowloon, Hong Kong; chenylui4-c@my.cityu.edu.hk

\* Correspondence: shechen@cityu.edu.hk; Tel.: +852-3442-5782

† These authors contributed equally to this work.

**Keywords:** *A. baumannii*; carbapenem resistance; carbapenem-hydrolyzing class D  $\beta$ -lactamases (CHDLs); OXA-51 variants; structure/function relationship

**Table S1.** Characteristics of 14 *A. baumannii* clinical strains included in this study.

| Strain | Year and Place of Isolation | ST Type (Oxford) | International Clone | Presence of Resistance Determinants |             |              |                                       |                                     |                                  |                                    |
|--------|-----------------------------|------------------|---------------------|-------------------------------------|-------------|--------------|---------------------------------------|-------------------------------------|----------------------------------|------------------------------------|
|        |                             |                  |                     | <i>carO</i>                         | <i>adeB</i> | <i>adeRS</i> | <i>bla</i> <sub>OXA-51</sub> Variants | <i>ISAbal-bla</i> <sub>OXA-51</sub> | <i>bla</i> <sub>OXA-</sub> 24/40 | <i>ISAbal-bla</i> <sub>OXA23</sub> |
| AB1    | 2004, Hong Kong             | 208              | IC II               | +                                   | +           | -            | OXA-83                                | +                                   | -                                | -                                  |
| AB2    | 2008, Hong Kong             | 940              | Non-IC II           | +                                   | +           | +            | OXA-99                                | -                                   | OXA-23                           | +                                  |
| AB3    | 2011, Hong Kong             | 208              | IC II               | +                                   | -           | -            | OXA-66                                | +                                   | OXA-23 <sup>#</sup>              | +                                  |
| AB4    | 2011, Hong Kong             | 253              | IC II               | +                                   | +           | +            | OXA-66                                | -                                   | OXA-23                           | +                                  |
| AB5    | 2004, Hong Kong             | 940              | Non-IC II           | +                                   | +           | +            | OXA-99                                | -                                   | OXA-23                           | +                                  |
| AB7    | 2011, Hong Kong             | 208              | IC II               | +                                   | +           | +            | OXA-82                                | +                                   | -                                | -                                  |
| AB8    | 2003, Hong Kong             | 208              | IC II               | +                                   | +           | +            | OXA-82                                | +                                   | -                                | -                                  |
| AB10   | 2000, Hong Kong             | 208              | IC II               | +                                   | +           | +            | OXA-66                                | -                                   | -                                | -                                  |
| MH1    | 2000, Hong Kong             | 684              | IC II               | +                                   | +           | +            | OXA-66                                | -                                   | -                                | -                                  |
| MH2    | 2010, Hong Kong             | 218              | IC II               | +                                   | +           | +            | OXA-66                                | -                                   | OXA-72                           | -                                  |
| MH3    | 2011, Hong Kong             | 208              | IC II               | +                                   | +           | +            | OXA-79                                | +                                   | -                                | -                                  |
| MH5    | 2006, Hong Kong             | 940              | Non-IC II           | +                                   | -           | -            | OXA-99                                | -                                   | OXA-23                           | +                                  |
| MH6    | 2013, Henan, China          | 195              | IC II               | +                                   | +           | +            | OXA-66                                | -                                   | OXA-23                           | +                                  |
| MH7    | 2013, Henan, China          | 369              | IC II               | +                                   | +           | +            | OXA-66                                | -                                   | OXA-23 <sup>#</sup>              | +                                  |

Presence of endogenous genes and other resistance determinants were obtained from analysis of whole genome sequences. <sup>#</sup> Chromosomal located.
